# Supplementary material
Source: Research Square preprint supplement (doi:10.21203/rs.3.rs-9985831/v1)
Supplement: Supplementary file 1 [file 837fc8a8c1bfead4dd4f15a0.pdf]

## Supplementary Material

### **Specification-Dependent Associations of Blood Lead, Cadmium, and Mercury with Cognitive Performance in Older U.S. Adults: A Specification Curve Analysis of NHANES 2011–2014**

Sewon Jung

List of supplementary items

Supplementary Table S1. Covariate sets used in the specification-curve analysis.

Supplementary Table S2. Weighted geometric means...

Supplementary Table S3. Specification-curve summaries across cognitive outcomes.

Supplementary Table S4. Cycle-stratified lead–DSST regression estimates.

Supplementary Table S5. Sensitivity of specification-curve robustness summaries to handling specifications with unavailable p-values.

Supplementary Figure S1. Joint influence of covariate set and exposure parameterization on statistically significant metal–DSST associations.

### Supplementary Table S1. Covariate sets used in the specification curve

Nested adjustment sets evaluated as one specification dimension

| Covariate set | Variables included                                                                                                  | Purpose                                             |
|---------------|---------------------------------------------------------------------------------------------------------------------|-----------------------------------------------------|
| Minimal       | Age, sex, race/ethnicity                                                                                            | Baseline demographic adjustment                     |
| Standard      | Minimal set + education, poverty income ratio, smoking status                                                       | Socioeconomic and smoking adjustment                |
| Extended      | Standard set + body mass index, diabetes, hypertension, fish/shellfish consumption, alcohol drinks per drinking day | Cardiometabolic, dietary, and behavioral adjustment |

**Supplementary Table S1. Covariate sets used in the specification-curve analysis.** The minimal set included age, sex, and race/ethnicity. The standard set added educational attainment, family poverty income ratio, and smoking status. The extended set added body mass index, self-reported diabetes, self-reported hypertension, past-30-day fish/shellfish consumption, and average alcoholic drinks per drinking day. These nested sets were interpreted as sensitivity structures rather than a single definitive causal adjustment set (Section 2.4).

### Supplementary Table S2. Weighted geometric means of blood metals

NHANES 2011-2014 adults aged 60+ years with non-zero blood metal survey weights

| Metal | Unit  | Unweighted n | Geometric mean (95% CI) |
|-------|-------|--------------|-------------------------|
| Pb    | µg/dL | 2439         | 1.46 (1.39, 1.54)       |
| Cd    | µg/L  | 2439         | 0.37 (0.35, 0.39)       |
| Hg    | µg/L  | 2439         | 0.96 (0.85, 1.07)       |

Values use survey weights; confidence intervals are shown for geometric means.

**Supplementary Table S2. Weighted geometric means of blood lead, cadmium, and total mercury concentrations in the metal-weighted analytic sample (N = 2,536).** Geometric means and 95% confidence intervals were estimated using the NHANES complex survey design and the four-year blood metal analytic weight (WT\_metal\_4YR). Lead is reported in µg/dL; cadmium and total mercury are reported in µg/L.

### Supplementary Table S3. Specification-curve summary across cognitive outcomes

Each outcome used the same 864-specification grid per metal

| Outcome     | Metal | Specifications | Negative % | Sig. negative % | Sig. positive % |
|-------------|-------|----------------|------------|-----------------|-----------------|
| DSST (main) | Cd    | 864            | 97.0       | 46.8            | 0.0             |
| AFT         | Cd    | 864            | 82.2       | 19.0            | 0.0             |
| CERAD_imm   | Cd    | 864            | 85.1       | 16.9            | 0.0             |
| CERAD_del   | Cd    | 864            | 74.4       | 8.3             | 0.0             |
| Global_z    | Cd    | 864            | 99.4       | 43.4            | 0.0             |
| DSST (main) | Hg    | 864            | 20.7       | 0.1             | 33.3            |
| AFT         | Hg    | 864            | 8.6        | 0.0             | 36.3            |
| CERAD_imm   | Hg    | 864            | 11.3       | 0.0             | 24.1            |
| CERAD_del   | Hg    | 864            | 30.6       | 0.0             | 20.8            |
| Global_z    | Hg    | 864            | 13.4       | 0.0             | 40.0            |
| DSST (main) | Pb    | 864            | 68.4       | 5.4             | 0.8             |
| AFT         | Pb    | 864            | 13.1       | 0.0             | 2.7             |
| CERAD_imm   | Pb    | 864            | 92.8       | 9.8             | 0.0             |
| CERAD_del   | Pb    | 864            | 67.0       | 2.5             | 0.2             |
| Global_z    | Pb    | 864            | 62.0       | 2.7             | 0.0             |

Sig. = statistically significant at two-sided  $p < 0.05$  within each individual specification.

**Supplementary Table S3. Specification-curve summaries across the primary and four secondary cognitive outcomes.** Outcomes are the Digit Symbol Substitution Test (DSST; primary), Animal Fluency Test, CERAD immediate recall, CERAD delayed recall, and the global cognitive composite z-score. Each row summarizes 864 specifications for one metal–outcome pair. Percentages indicate the proportion of specifications yielding negative point estimates, statistically significant negative estimates, or statistically significant positive estimates at two-sided  $p < 0.05$  within each individual specification. Because the four secondary outcomes are correlated, these proportions are descriptive cross-outcome consistency indicators and are not multiple-testing-adjusted inferential probabilities.

### Supplementary Table S4. Cycle-stratified lead regression results

Primary standard-covariate single-metal model fitted separately by NHANES cycle

| Analysis        | N    | Beta per ln-unit (95% CI) | Beta per doubling (95% CI) | p-value |
|-----------------|------|---------------------------|----------------------------|---------|
| 2011-2012 only  | 1234 | 0.38 (-3.05, 3.82)        | 0.27 (-2.11, 2.65)         | 0.772   |
| 2013-2014 only  | 710  | -0.45 (-5.56, 4.66)       | -0.31 (-3.85, 3.23)        | 0.742   |
| Combined (main) | 1944 | 0.05 (-1.72, 1.81)        | 0.03 (-1.19, 1.26)         | 0.956   |

Cycle-specific analyses used the appropriate two-year weight for each cycle.

**Supplementary Table S4. Cycle-stratified lead–DSST regression estimates.** The primary standard-covariate lead–DSST model was estimated separately in the 2011–2012 cycle (using WTMEC2YR), the 2013–2014 cycle (using WTSH2YR), and the combined 2011–2014 sample (using the four-year blood metal analytic weight WT\_metal\_4YR). Estimates are shown per ln-unit increase in blood lead, with 95% confidence intervals, p-values, and analytic sample sizes. These analyses evaluated whether the pooled lead estimate was influenced by cycle-specific heterogeneity.

### Supplementary Table S5, Panel A. Weighted-only and p-value-availability diagnostics

Overall, survey-weighted, unweighted, and survey-weighted p-value-available summaries

| Metal | Subset                             | Specifications | Unavailable p-values | Unavailable p-values % | Negative % | Sig. negative % | Sig. positive % |
|-------|------------------------------------|----------------|----------------------|------------------------|------------|-----------------|-----------------|
| Cd    | All specifications                 | 864            | 132                  | 15.3                   | 97.0       | 46.8            | 0.0             |
| Cd    | Survey-weighted only               | 432            | 132                  | 30.6                   | 95.8       | 27.1            | 0.0             |
| Cd    | Unweighted only                    | 432            | 0                    | 0.0                    | 98.1       | 66.4            | 0.0             |
| Cd    | Survey-weighted, p-value available | 300            | 0                    | 0.0                    | 97.0       | 39.0            | 0.0             |
| Hg    | All specifications                 | 864            | 132                  | 15.3                   | 20.7       | 0.1             | 33.3            |
| Hg    | Survey-weighted only               | 432            | 132                  | 30.6                   | 17.1       | 0.0             | 35.2            |
| Hg    | Unweighted only                    | 432            | 0                    | 0.0                    | 24.3       | 0.2             | 31.5            |
| Hg    | Survey-weighted, p-value available | 300            | 0                    | 0.0                    | 7.3        | 0.0             | 50.7            |
| Pb    | All specifications                 | 864            | 132                  | 15.3                   | 68.4       | 5.4             | 0.8             |
| Pb    | Survey-weighted only               | 432            | 132                  | 30.6                   | 76.4       | 4.9             | 0.0             |
| Pb    | Unweighted only                    | 432            | 0                    | 0.0                    | 60.4       | 6.0             | 1.6             |
| Pb    | Survey-weighted, p-value available | 300            | 0                    | 0.0                    | 75.7       | 7.0             | 0.0             |

Percentages use the displayed subset as the denominator. Specifications with unavailable p-values were retained in denominators and counted as non-significant in the primary all-specification summaries.

**Supplementary Table S5, Panel B. Unavailable p-values by specification dimension level: Hg**

Counts and percentages of specifications with unavailable focal-metal p-values

| Metal | Dimension                 | Level             | Specifications | Unavailable p-values | Unavailable p-values % |
|-------|---------------------------|-------------------|----------------|----------------------|------------------------|
| Hg    | Exposure parameterization | log_continuous    | 288            | 44                   | 15.3                   |
| Hg    | Exposure parameterization | quartile          | 288            | 44                   | 15.3                   |
| Hg    | Exposure parameterization | z_continuous      | 288            | 44                   | 15.3                   |
| Hg    | Metal modeling strategy   | mutual            | 432            | 84                   | 19.4                   |
| Hg    | Metal modeling strategy   | single            | 432            | 48                   | 11.1                   |
| Hg    | Covariate set             | extended          | 288            | 96                   | 33.3                   |
| Hg    | Covariate set             | minimal           | 288            | 0                    | 0.0                    |
| Hg    | Covariate set             | standard          | 288            | 36                   | 12.5                   |
| Hg    | Outlier handling          | none              | 432            | 66                   | 15.3                   |
| Hg    | Outlier handling          | winsor99          | 432            | 66                   | 15.3                   |
| Hg    | Missing-data handling     | complete_case     | 432            | 60                   | 13.9                   |
| Hg    | Missing-data handling     | missing_indicator | 432            | 72                   | 16.7                   |
| Hg    | Survey weighting          | unweighted        | 432            | 0                    | 0.0                    |
| Hg    | Survey weighting          | weighted          | 432            | 132                  | 30.6                   |
| Hg    | Age threshold             | 60                | 432            | 66                   | 15.3                   |
| Hg    | Age threshold             | 65                | 432            | 66                   | 15.3                   |
| Hg    | Survey cycle              | 2011_only         | 288            | 60                   | 20.8                   |
| Hg    | Survey cycle              | 2013_only         | 288            | 72                   | 25.0                   |
| Hg    | Survey cycle              | combined          | 288            | 0                    | 0.0                    |

Unavailable p-values occurred only in survey-weighted, cycle-specific specifications.

**Supplementary Table S5, Panel B. Unavailable p-values by specification dimension level: Cd**

Counts and percentages of specifications with unavailable focal-metal p-values

| Metal | Dimension                 | Level             | Specifications | Unavailable p-values | Unavailable p-values % |
|-------|---------------------------|-------------------|----------------|----------------------|------------------------|
| Cd    | Exposure parameterization | log_continuous    | 288            | 44                   | 15.3                   |
| Cd    | Exposure parameterization | quartile          | 288            | 44                   | 15.3                   |
| Cd    | Exposure parameterization | z_continuous      | 288            | 44                   | 15.3                   |
| Cd    | Metal modeling strategy   | mutual            | 432            | 84                   | 19.4                   |
| Cd    | Metal modeling strategy   | single            | 432            | 48                   | 11.1                   |
| Cd    | Covariate set             | extended          | 288            | 96                   | 33.3                   |
| Cd    | Covariate set             | minimal           | 288            | 0                    | 0.0                    |
| Cd    | Covariate set             | standard          | 288            | 36                   | 12.5                   |
| Cd    | Outlier handling          | none              | 432            | 66                   | 15.3                   |
| Cd    | Outlier handling          | winsor99          | 432            | 66                   | 15.3                   |
| Cd    | Missing-data handling     | complete_case     | 432            | 60                   | 13.9                   |
| Cd    | Missing-data handling     | missing_indicator | 432            | 72                   | 16.7                   |
| Cd    | Survey weighting          | unweighted        | 432            | 0                    | 0.0                    |
| Cd    | Survey weighting          | weighted          | 432            | 132                  | 30.6                   |
| Cd    | Age threshold             | 60                | 432            | 66                   | 15.3                   |
| Cd    | Age threshold             | 65                | 432            | 66                   | 15.3                   |
| Cd    | Survey cycle              | 2011_only         | 288            | 60                   | 20.8                   |
| Cd    | Survey cycle              | 2013_only         | 288            | 72                   | 25.0                   |
| Cd    | Survey cycle              | combined          | 288            | 0                    | 0.0                    |

Unavailable p-values occurred only in survey-weighted, cycle-specific specifications.

**Supplementary Table S5, Panel B. Unavailable p-values by specification dimension level: Pb**

Counts and percentages of specifications with unavailable focal-metal p-values

| Metal | Dimension                 | Level             | Specifications | Unavailable p-values | Unavailable p-values % |
|-------|---------------------------|-------------------|----------------|----------------------|------------------------|
| Pb    | Exposure parameterization | log_continuous    | 288            | 44                   | 15.3                   |
| Pb    | Exposure parameterization | quartile          | 288            | 44                   | 15.3                   |
| Pb    | Exposure parameterization | z_continuous      | 288            | 44                   | 15.3                   |
| Pb    | Metal modeling strategy   | mutual            | 432            | 84                   | 19.4                   |
| Pb    | Metal modeling strategy   | single            | 432            | 48                   | 11.1                   |
| Pb    | Covariate set             | extended          | 288            | 96                   | 33.3                   |
| Pb    | Covariate set             | minimal           | 288            | 0                    | 0.0                    |
| Pb    | Covariate set             | standard          | 288            | 36                   | 12.5                   |
| Pb    | Outlier handling          | none              | 432            | 66                   | 15.3                   |
| Pb    | Outlier handling          | winsor99          | 432            | 66                   | 15.3                   |
| Pb    | Missing-data handling     | complete_case     | 432            | 60                   | 13.9                   |
| Pb    | Missing-data handling     | missing_indicator | 432            | 72                   | 16.7                   |
| Pb    | Survey weighting          | unweighted        | 432            | 0                    | 0.0                    |
| Pb    | Survey weighting          | weighted          | 432            | 132                  | 30.6                   |
| Pb    | Age threshold             | 60                | 432            | 66                   | 15.3                   |
| Pb    | Age threshold             | 65                | 432            | 66                   | 15.3                   |
| Pb    | Survey cycle              | 2011_only         | 288            | 60                   | 20.8                   |
| Pb    | Survey cycle              | 2013_only         | 288            | 72                   | 25.0                   |
| Pb    | Survey cycle              | combined          | 288            | 0                    | 0.0                    |

Unavailable p-values occurred only in survey-weighted, cycle-specific specifications.

**Supplementary Table S5. Weighted-only and p-value-availability diagnostics for DSST specification summaries.** Panel A compares overall, survey-weighted, unweighted, and survey-weighted p-value-available subsets. Panel B summarizes unavailable p-values across specification-dimension levels. Specifications with unavailable p-values were retained in denominators and counted as non-significant in the primary summaries.

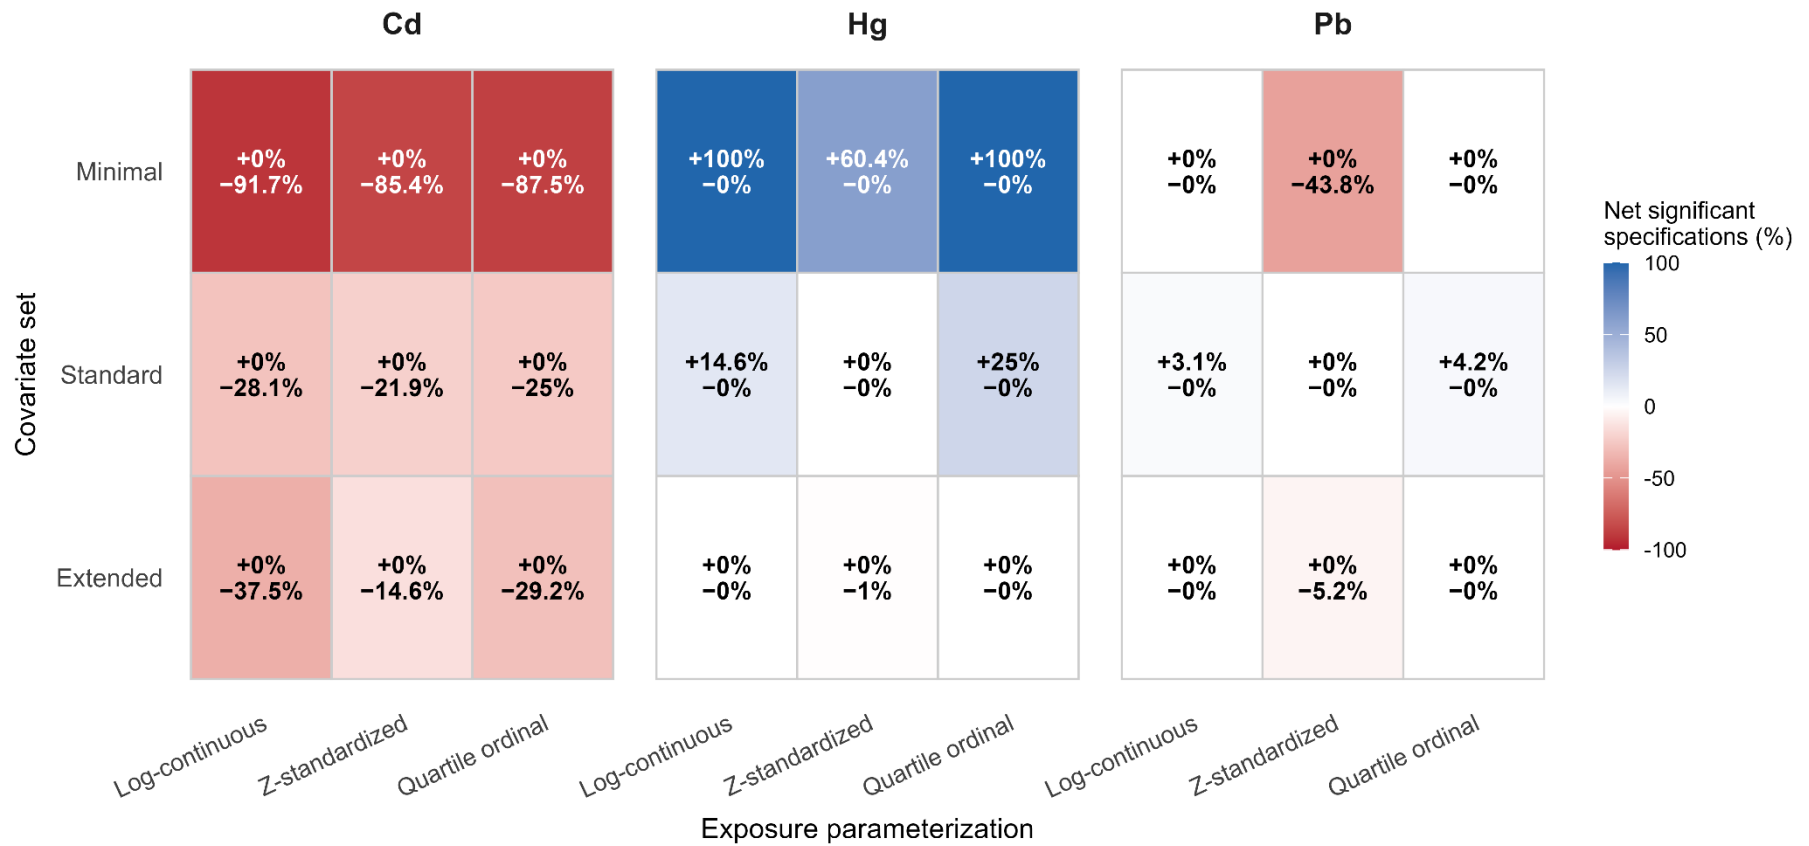

**Supplementary Figure S1. Joint influence of covariate set and exposure parameterization on statistically significant metal–DSST associations.** Each cell summarizes specifications within a given metal, covariate set, and exposure-parameterization stratum. Cell labels report the percentage of specifications yielding statistically significant positive (+) and negative (–) associations at  $p < 0.05$ . Tile color represents the net difference between significant positive and significant negative percentages; blue indicates positive-dominant strata, red indicates negative-dominant strata, and white indicates little net imbalance. This figure complements the marginal summaries in Figure 3 by showing the joint pattern for two specification dimensions that strongly influenced the results.
