# Supplementary material
Source: Research Square preprint supplement (doi:10.21203/rs.3.rs-9985831/v1)
Supplement: Supplementary file 2 [file aa230d9f9dfa8672b5677ce4.docx]

**Table 1. Characteristics of NHANES 2011–2014 adults aged 60 years or older with valid blood metal survey weights.** The analytic sample included 2,536 unweighted participants.

| **Characteristic** | **Overall N = 59,659,564** | **2011-2012 N = 28,921,337** | **2013-2014 N = 30,738,226** | **p-value** |
| --- | --- | --- | --- | --- |
| **Age (years)** | 69.6 (6.8) | 69.7 (6.9) | 69.4 (6.6) | 0.7 |
| **Sex** |  |  |  | 0.9 |
| Male | 45% (1,242) | 45% (839) | 45% (403) |  |
| Female | 55% (1,294) | 55% (848) | 55% (446) |  |
| **Race/ethnicity** |  |  |  | 0.6 |
| NH White | 78% (1,132) | 77% (708) | 78% (424) |  |
| NH Black | 9.0% (628) | 8.9% (462) | 9.1% (166) |  |
| Hispanic | 7.7% (479) | 7.6% (313) | 7.9% (166) |  |
| NH Asian | 4.1% (255) | 3.9% (172) | 4.2% (83) |  |
| Other | 1.6% (42) | 2.4% (32) | 0.9% (10) |  |
| **Education** |  |  |  | 0.6 |
| <HS | 19% (766) | 21% (542) | 17% (224) |  |
| HS/GED | 23% (580) | 22% (373) | 23% (207) |  |
| Some college | 29% (654) | 29% (431) | 29% (223) |  |
| College+ | 29% (531) | 28% (337) | 31% (194) |  |
| Missing | 37,193 | 26,402 | 10,791 |  |
| **Poverty income ratio** | 2.86 (1.57, 5.00) | 2.86 (1.60, 5.00) | 2.84 (1.56, 5.00) | 0.9 |
| Missing | 4,120,795 | 2,252,373 | 1,868,422 |  |
| **Smoking status** |  |  |  | 0.082 |
| Never | 50% (1,280) | 50% (844) | 50% (436) |  |
| Former | 40% (934) | 39% (622) | 42% (312) |  |
| Current | 10.0% (321) | 12% (220) | 8.3% (101) |  |
| Missing | 7,483 | 7,483 | 0 |  |
| **Serum cotinine (ng/mL)** | 0.02 (0.01, 0.07) | 0.02 (0.01, 0.08) | 0.02 (0.01, 0.06) | 0.6 |
| Missing | 2,423,328 | 1,893,546 | 529,783 |  |
| **Alcohol drinks per day** | 1.0 (1.0, 2.0) | 1.0 (1.0, 2.0) | 1.0 (1.0, 2.0) | 0.4 |
| Missing | 23,645,096 | 12,003,977 | 11,641,120 |  |
| **Body mass index (kg/m²)** | 29.0 (6.4) | 28.7 (6.2) | 29.2 (6.5) | 0.3 |
| Missing | 1,059,528 | 608,917 | 450,611 |  |
| **Diabetes (self-reported)** | 20% (608) | 20% (417) | 20% (191) | >0.9 |
| Missing | 22,658 | 4,607 | 18,051 |  |
| **Hypertension (self-reported)** | 59% (1,571) | 59% (1,050) | 59% (521) | >0.9 |
| Missing | 78,433 | 78,433 | 0 |  |
| **Self-rated health** |  |  |  | 0.038 |
| Excellent | 9.9% (185) | 12% (126) | 7.7% (59) |  |
| Very good | 30% (545) | 30% (363) | 30% (182) |  |
| Good | 38% (945) | 38% (626) | 37% (319) |  |
| Fair | 19% (597) | 16% (384) | 21% (213) |  |
| Poor | 3.6% (131) | 3.8% (93) | 3.4% (38) |  |
| Missing | 2,152,912 | 1,254,181 | 898,731 |  |
| **Fish consumption (times/30d)** | 3.0 (2.0, 6.0) | 4.0 (2.0, 6.0) | 3.0 (2.0, 6.0) | 0.4 |
| Missing | 15,749,046 | 6,995,560 | 8,753,486 |  |
| **Shellfish consumption (times/30d)** | 2.0 (1.0, 4.0) | 2.0 (1.0, 4.0) | 2.0 (1.0, 4.0) | 0.7 |
| Missing | 31,996,677 | 15,359,636 | 16,637,041 |  |
| **Blood lead (µg/dL)** | 1.38 (0.97, 2.10) | 1.52 (1.04, 2.26) | 1.28 (0.93, 1.98) | 0.008 |
| Missing | 1,081,033 | 1,081,033 | 0 |  |
| **Blood cadmium (µg/L)** | 0.36 (0.24, 0.57) | 0.38 (0.25, 0.59) | 0.33 (0.22, 0.53) | 0.008 |
| Missing | 1,081,033 | 1,081,033 | 0 |  |
| **Blood total mercury (µg/L)** | 0.89 (0.47, 1.82) | 0.93 (0.48, 2.05) | 0.88 (0.46, 1.67) | 0.5 |
| Missing | 1,081,033 | 1,081,033 | 0 |  |
| **DSST score** | 51.7 (17.0) | 52.4 (17.4) | 51.2 (16.7) | 0.4 |
| Missing | 4,814,191 | 3,111,451 | 1,702,740 |  |
| **Animal Fluency Test** | 17.8 (5.8) | 18.0 (5.9) | 17.7 (5.6) | 0.5 |
| Missing | 3,940,935 | 2,745,656 | 1,195,279 |  |
| **CERAD immediate recall (0-30)** | 19.5 (4.7) | 18.7 (4.7) | 20.3 (4.7) | <0.001 |
| Missing | 3,722,636 | 2,815,370 | 907,266 |  |
| **CERAD delayed recall (0-10)** | 6.1 (2.4) | 5.8 (2.3) | 6.4 (2.4) | <0.001 |
| Missing | 3,831,609 | 2,836,714 | 994,895 |  |
| **Global cognitive z-score** | 0.3 (0.8) | 0.2 (0.8) | 0.4 (0.8) | 0.11 |
| Missing | 5,867,700 | 3,798,218 | 2,069,483 |  |

Values are mean (SD), median (Q1, Q3), or weighted % (unweighted N). Weights: WT_metal_4YR. Regression analyses used complete-case subsamples; the main standard-covariate specification included N = 1,944. p-values: design-based Kruskal-Wallis test or Rao-Scott adjusted Pearson X2.

**Table 2. Primary survey-weighted regression estimates for blood metal–DSST associations.** Estimates are shown per ln-unit increase and per doubling of metal concentration.

| **Model** | **N** | **Beta per ln-unit (95% CI)** | **Beta per doubling (95% CI)** | **p-value** |
| --- | --- | --- | --- | --- |
| Single-metal: Pb | 1944 | 0.05 (-1.72, 1.81) | 0.03 (-1.19, 1.26) | 0.956 |
| Single-metal: Cd | 1944 | -0.93 (-2.31, 0.45) | -0.64 (-1.60, 0.31) | 0.176 |
| Single-metal: Hg | 1944 | 0.77 (0.10, 1.45) | 0.54 (0.07, 1.00) | 0.027 |
| Mutual: Pb | 1944 | 0.12 (-1.59, 1.83) | 0.08 (-1.10, 1.27) | 0.885 |
| Mutual: Cd | 1944 | -1.05 (-2.33, 0.23) | -0.73 (-1.61, 0.16) | 0.101 |
| Mutual: Hg | 1944 | 0.81 (0.14, 1.48) | 0.56 (0.09, 1.02) | 0.021 |

Per-doubling β = ln-unit β × ln(2); models used complete-case samples.

**Table 3. Specification-curve robustness summaries for blood metal–DSST associations.** Panel A summarizes scale-invariant robustness measures across all 864 specifications per metal. Panel B reports coefficient summaries within exposure-parameterization strata because coefficient magnitudes are not comparable across log-continuous, quartile-coded, and z-standardized exposure scales.

**Table 3, Panel A. Overall specification-curve robustness summary**

| **Metal** | **Specifications** | **Negative %** | **Sig. negative %** | **Sig. positive %** |
| --- | --- | --- | --- | --- |
| Cd | 864 | 97.0 | 46.8 | 0.0 |
| Hg | 864 | 20.7 | 0.1 | 33.3 |
| Pb | 864 | 68.4 | 5.4 | 0.8 |

**Panel B. Specification-curve summary by exposure scale**

| **Metal** | **Exposure scale** | **Specifications** | **Negative %** | **Sig. negative %** | **Sig. positive %** | **Median beta** | **Q1 beta** | **Q3 beta** |
| --- | --- | --- | --- | --- | --- | --- | --- | --- |
| Cd | Log-continuous | 288 | 100.0 | 52.4 | 0.0 | -1.600 | -2.629 | -1.173 |
| Cd | Quartile ordinal | 288 | 98.6 | 47.2 | 0.0 | -0.846 | -1.431 | -0.610 |
| Cd | Z-standardized | 288 | 92.4 | 40.6 | 0.0 | -1.069 | -1.818 | -0.434 |
| Hg | Log-continuous | 288 | 13.5 | 0.0 | 38.2 | 0.685 | 0.277 | 2.118 |
| Hg | Quartile ordinal | 288 | 11.1 | 0.0 | 41.7 | 0.709 | 0.285 | 1.986 |
| Hg | Z-standardized | 288 | 37.5 | 0.3 | 20.1 | 0.155 | -0.193 | 1.102 |
| Pb | Log-continuous | 288 | 60.1 | 0.0 | 1.0 | -0.175 | -0.613 | 0.329 |
| Pb | Quartile ordinal | 288 | 54.9 | 0.0 | 1.4 | -0.038 | -0.317 | 0.288 |
| Pb | Z-standardized | 288 | 90.3 | 16.3 | 0.0 | -0.589 | -0.847 | -0.352 |

Sig. = statistically significant at two-sided p < 0.05 within each individual specification.
